# Supplementary material for: Climatic niche evolution in the viviparous Sceloporus torquatus group (Squamata: Phrynosomatidae)
Source: PeerJ journal article supplement (doi:10.7717/peerj.6192), 2019-01-09
Supplement: Figure_S3.pdf [file Figure_S3.pdf]

**Tmax1**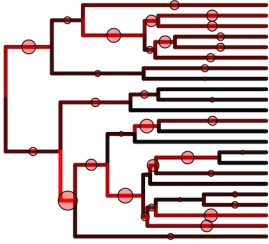**PET5**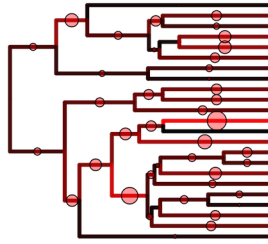**Prec5**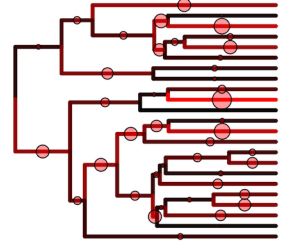**Prec10**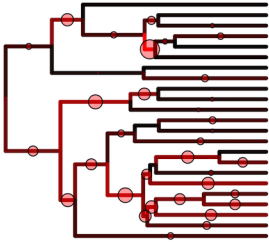**Bio2**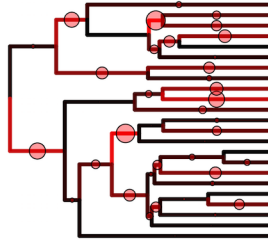**Bio5**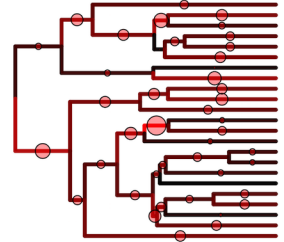**Bio8**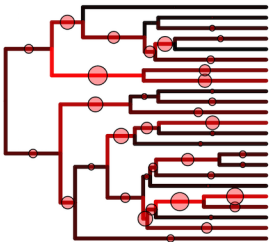**Bio9**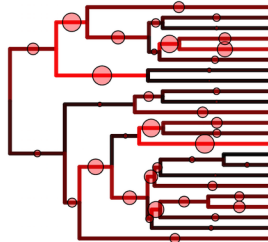**Bio15**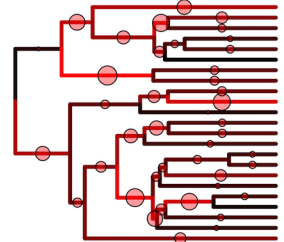**Bio18**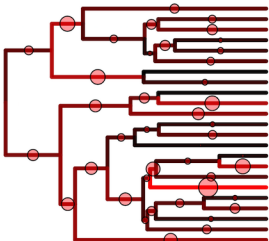**Bio19**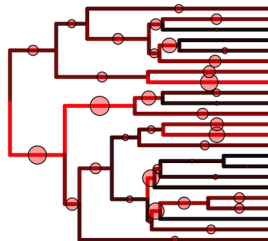

● pp = 0.25
