# Supplementary material for: Climatic niche evolution in the viviparous Sceloporus torquatus group (Squamata: Phrynosomatidae)
Source: PeerJ journal article supplement (doi:10.7717/peerj.6192), 2019-01-09

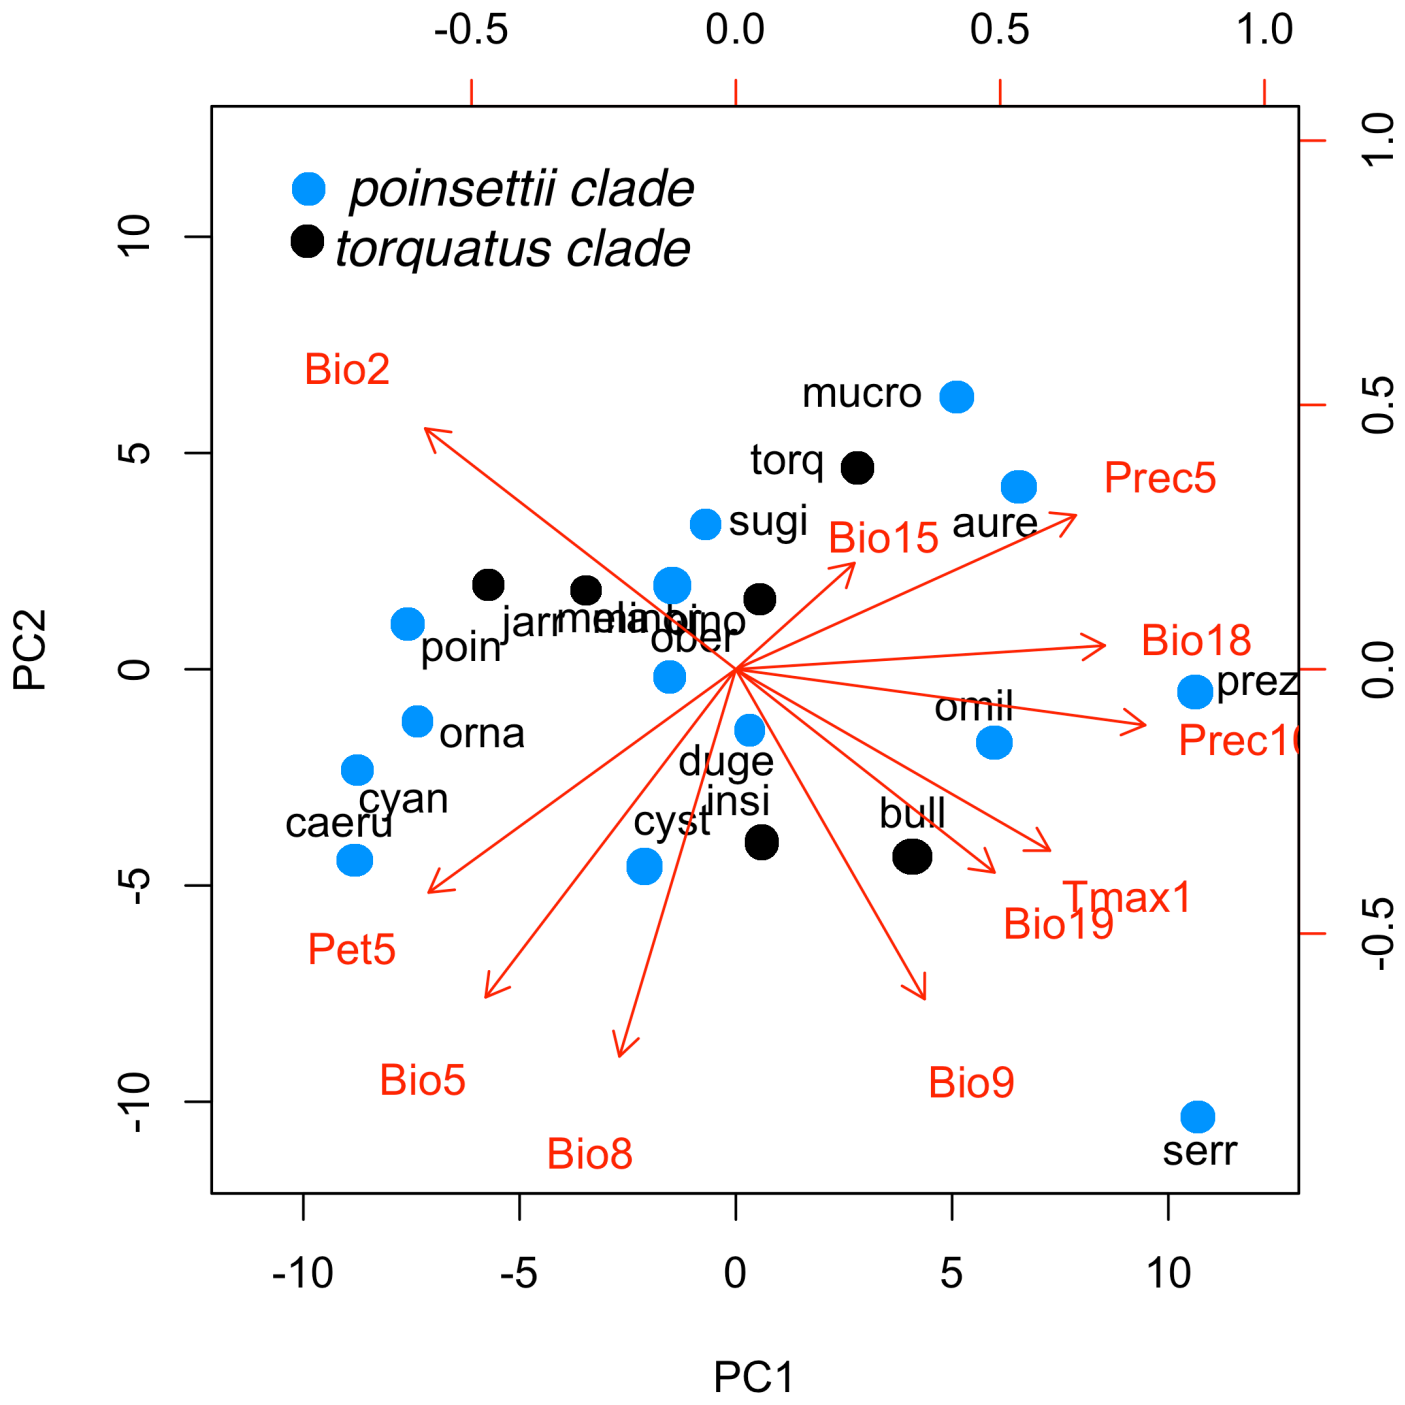

Supplement: Figure_S4._pPca.pdf [file Figure_S4._pPca.pdf]
