# Supplementary material for: Climatic niche evolution in the viviparous Sceloporus torquatus group (Squamata: Phrynosomatidae)
Source: PeerJ journal article supplement (doi:10.7717/peerj.6192), 2019-01-09
Supplement: Figure_S6_Variation_in_PC_scores_of_bioclimatic_variables_along_the_phylogeny.pdf [file Figure_S6_Variation_in_PC_scores_of_bioclimatic_variables_along_the_phylogeny.pdf]

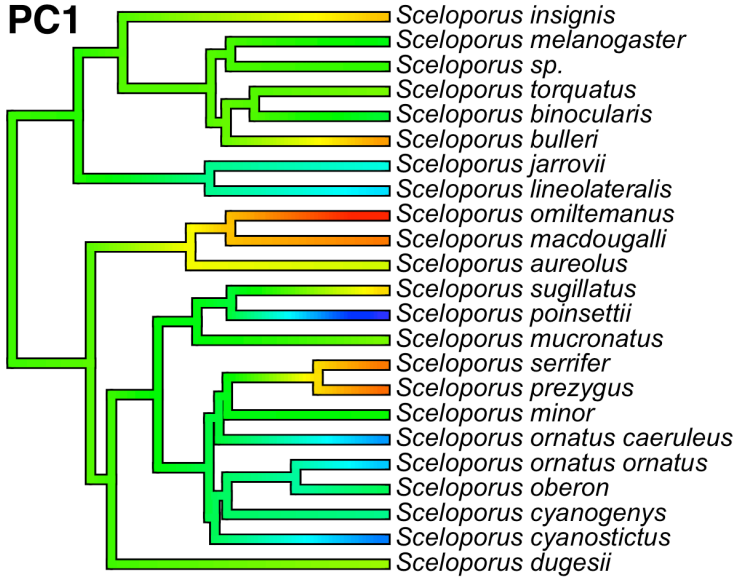

-5.214 trait value 6.15  
length=5.177

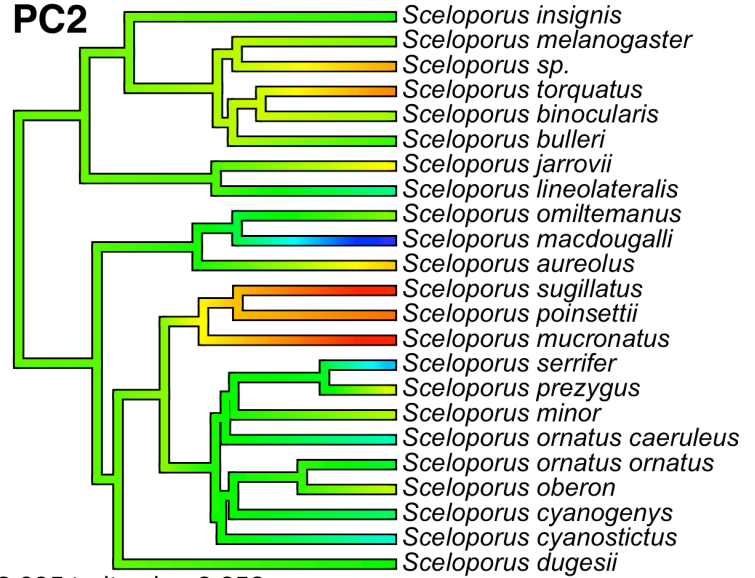

-3.995 trait value 6.656  
length=5.177

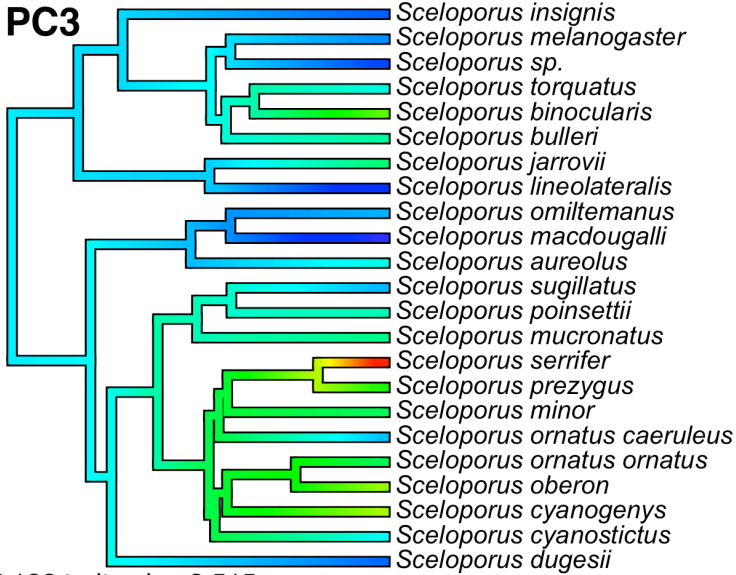

-5.122 trait value 2.515  
length=5.177
